1 **Integrating virtual reality, electroencephalography, and transcranial**  
2 **magnetic stimulation to study the neural origin of the sublime: The**  
3 **SUBRAIN protocol**

4 **Elena Bondi**<sup>ID 1,2</sup>, **Flavia Carbone**<sup>ID 2,3</sup>, **Marta Pizzolante**<sup>ID 4</sup>, **Giandomenico Schiena**<sup>ID 3</sup>, **Adele Ferro**<sup>ID 3</sup>, **Maddalena**  
5 **Mazzocut-Mis**<sup>ID 5</sup>, **Andrea Gaggioli**<sup>ID 4,6</sup>, **Alice Chirico**<sup>ID 4,¶</sup>, **Paolo Brambilla**<sup>ID 1,3,\*,¶</sup>, **Eleonora Maggioni**<sup>ID 2,3¶</sup>

6 <sup>1</sup> Department of Pathophysiology and Transplantation, Università degli Studi di Milano, Milan, Italy

7 <sup>2</sup> Department of Electronics, Information and Bioengineering, Politecnico di Milano, Milan, Italy

8 <sup>3</sup> Department of Neurosciences and Mental Health, Fondazione IRCCS Ca' Granda-Ospedale Maggiore Policlinico, Milan,  
9 Italy

10 <sup>4</sup> Research Center in Communication Psychology (PsiCom), Università Cattolica del Sacro Cuore, Milan, Italy

11 <sup>5</sup> Department of Cultural Heritage and Environment, Università degli Studi di Milano, Milan, Italy

12 <sup>6</sup> IRCCS Istituto Auxologico Italiano, Milan, Italy

13 \* Corresponding author

14 Email: [paolo.brambilla1@unimi.it](mailto:paolo.brambilla1@unimi.it)

15 ¶ These authors contributed equally to this work.

## 16 **Abstract**

### 17 **Introduction**

18 Awe is a complex emotion unveiling a positive and mixed nature, which resembles the Romantic feeling of the  
19 Sublime. It has increasingly become the object of scientific investigation in the last twenty years. However, its  
20 underlying brain mechanisms are still unclear. To fully capture its nature in the lab, researchers have increasingly  
21 relied on virtual reality (VR) as an emotion-elicitation method, which can resemble even complex phenomena in a  
22 limited space. In this work, a multidisciplinary team proposed a novel experimental protocol integrating VR,  
23 electroencephalography (EEG), and transcranial magnetic stimulation (TMS) to investigate the brain mechanisms  
24 of this emotion.

### 25 **Methods**

26 A group of bioengineers, psychologists, psychiatrists, and philosophers designed the SUBRAIN study, a single-  
27 center, one-harm, non-randomized interventional study to explore the neural processes underlying awe experiences.  
28 The study will be performed on fifty adults. The experimental protocol includes different steps: (i) screening, (ii)  
29 enrollment, (iii) pre-experimental assessment, (iv) VR experimental assessment, and (v) post-experimental  
30 debriefing. The brain's electrical activity is recorded using the EEG while participants navigated three immersive  
31 awe-inducing VR environments (VREs) and a neutral one. At the same time, the cortical excitability and  
32 connectivity is investigated by performing a TMS-EEG session right after each VR navigation. Along with cerebral  
33 signals, self-reported questionnaires were used to assess the VR-induced changes in the emotional state of the  
34 subjects. This data is then analyzed to delve into the cerebral mechanisms of awe.

### 35 **Discussion**

36 This study protocol is the first one that tries to fully understand the neural bases of awe by eliciting and studying  
37 this phenomenon in VR. The pairing of awe-inducing VR experiences and questionnaires investigating participants'  
38 affect and emotions, with non-invasive neural techniques, can provide a novel and extensive knowledge on this

39 complex phenomenon. The protocol can inform on the combination of different instruments showing a reproducible  
40 and reliable setting for the investigation of induced complex emotions.

## 41 **Introduction**

42 The sublime – the mixed feeling of pleasure and displeasure – has its roots at the heart of the eighteenth century, in  
43 a precise philosophical tradition that leads to Kant’s theory, according to which the sublime has a systematic-  
44 transcendental nature and is a uniquely subjective feeling (1–3). This feeling-emotion is a combination of fear,  
45 enthusiasm, astonishment, wonder (4). Romanticism, furthermore, accentuates profound emotion as an authentic  
46 wellspring of aesthetic encounter (5). It bestows fresh significance upon occurrences of wonder and awe by  
47 legitimizing such sentiments as reactions to the sublime in nature.

48 In 2010, Richardson (6) establishes a connection between the eighteenth-century sublime (particularly that  
49 elaborated by Edmond Burke (1)) and neuroscience, while the following year, Onians (7) asserts that Burke did not  
50 know, as we do now, that the profound awe of Burkean origin occurs due to the operation of natural selection on  
51 our neural apparatus. In 2014, Ishizu and Seki report the results of a study conducted on 21 subjects to whom images  
52 of natural beauty and natural sublimity were shown while their brains were examined using fMRI technology (8).  
53 Ishizu and Seki’s researches demonstrates that natural beauty and natural sublimity activate different brain areas  
54 and evoke very different experiences in humans (8–10).

55 Recently, the sublime has increasingly become the subject of multidisciplinary and interdisciplinary investigations,  
56 combining philosophical and psychological approaches. A particular focus of psychology has been on awe as the  
57 subjective response to sublime stimuli (11,12), also besides the aesthetic domain (13,14). Despite initial neural  
58 evidence on the sublime stimuli (8), the understanding of awe’s underlying brain mechanisms remains at an early  
59 stage. Alike the sublime (15), awe emerged as an intense emotional state combining positive and negative  
60 components simultaneously (11,16), which arises in response to stimuli perceived as perceptually (e.g., waterfalls,  
61 trees, mountains, and tempests) (17) or conceptually (18) vast or overwhelming. Most studies have used awe-  
62 inducing videos or images to elicit awe in the lab, but these tend to elicit more subtle emotions with respect to those  
63 evoked by real-life experiences. In this context, virtual reality (VR) technology can be used to create a more intense  
64 laboratory version of awe (14,19). VR is capable of creating realistic scenarios (20) by also providing a multisensory

65 stimulation. Compared to other emotion-inducing tools, VR provides a unique sense of presence and immersion  
66 and a heightened emotional intensity of the experience (21). In 2018, our research team already validated three awe-  
67 inducing immersive VR environments representing natural scenarios (i.e., forest, mountains, and earth view from  
68 deep space) (22), since nature is recognized as the most frequent trigger of awe-inspiring experiences (23), as  
69 compared to a non-awe-inducing natural environment with green grass, trees, and flowers.

70 Although the mechanisms underpinning awe experiences remain largely elusive, awe-inducing VR scenarios  
71 designed for a laboratory setting can allow us to identify experiential, behavioral, cognitive, and brain correlates of  
72 awe. So far, few studies have investigated the brain activity correlates of the awe emotion through functional  
73 Magnetic Resonance Imaging (fMRI), suggesting the involvement of the default mode network (DMN) within awe  
74 experiences (24) and showing a proportional activation of cortical (temporal and frontal) and subcortical (basal  
75 ganglia and cerebellum) brain areas to the sublime intensity (25). Moreover, a recent fMRI study suggested the left  
76 middle temporal gyrus as pivotal in processing both positive and threatening awe experiences and explored its  
77 interactions with other brain regions usually involved in emotional processing (26). Despite this preliminary fMRI  
78 evidence, a more profound comprehension of the neural underpinnings of the awe experience is needed. In this  
79 context, a deeper knowledge of the brain activity and connectivity patterns underlying this complex experience can  
80 be obtained by combining electroencephalography (EEG) and transcranial magnetic stimulation (TMS). TMS and  
81 EEG are non-invasive techniques that provide direct insights into brain networks' instantaneous and directional  
82 interactions (27–30). Unlike fMRI, the EEG technique provides direct information on the brain's electrical activity  
83 (31), boasting exceptional time resolution to explore functional brain connectivity on the neuronal time scale across  
84 multiple frequency bands (27,30), while TMS enhances the EEG potential for studying the propagation of  
85 information within the brain networks (28,29). By leveraging EEG to track TMS pulses through functionally linked  
86 brain regions, TMS-EEG integration emerges as a valuable tool to investigate cortical excitability and effective  
87 (directional) connectivity. Hence, TMS-EEG integration holds promise in unveiling how the propagation of neural  
88 information within the brain networks is affected by sublime emotional experiences elicited by means of nature-  
89 based VR scenarios.

90 Within this context, for the first time, the multidisciplinary SUBRAIN project investigates the psychological and  
91 neural correlates of different laboratory instances of awe, with the ultimate goal of gaining a complete picture of  
92 the cerebral building blocks of this complex emotional experience. This ambitious aim is reached via the  
93 development of a new multimodal research protocol that integrates immersive nature-based VR scenarios, clinical  
94 questionnaires, EEG, and TMS.

95 In the proposed protocol, to provide evidence of how neuronal information propagates within the brain circuitry  
96 during awe experiences, participants perform an EEG study while navigating in natural VR environments validated  
97 to elicit awe (32). To monitor awe effects on the excitability of brain networks, after each VR experience, a TMS-  
98 EEG study is performed by sending TMS pulses to the left dorsolateral prefrontal cortex (DLPFC), which is believed  
99 to be affected by awe (25). Participants are then asked to fill out questionnaires addressing their emotions. We  
100 hypothesize that this innovative multimodal approach can provide key evidence of the psychological and neural  
101 correlates of awe experiences, which paves the way to plan experiential interventions for the promotion of mental  
102 well-being.

103

## 104 **Methods**

### 105 **Study aims**

106 The SUBRAIN study was born out of a multidisciplinary collaboration between biomedical engineers,  
107 psychologists, psychiatrists, and philosophers. It aims to provide unprecedented knowledge on the physiological  
108 emotional and neural mechanisms underlying the awe emotion. The following specific aims are pursued: (i) to test  
109 the feasibility of a multimodal neuro-centered experimental approach for studying the neurobiological bases of the  
110 awe experience in a laboratory environment, (ii) to explore brain responses to different VR experiences of awe, and  
111 (iii) to identify brain mechanisms linked with type and intensity of awe. The research protocol has been registered  
112 with Open Science Framework (<https://osf.io/m47du>).

### 113 **Study population**

114 Fifty young adults from the general Italian population will take part in the study. Recruitment started on  
115 February 18<sup>th</sup>, 2022, and is currently ongoing. The sample recruitment is performed via word of mouth. Inclusion  
116 criteria are (i) 20-40 years of age, (ii) normal or corrected vision, and (iii) capability to give informed consent and  
117 to comply with the study procedures. Exclusion criteria are (i) balance or vestibular disorders, (ii) severe  
118 migraine/headache, (iii) pregnancy, (iv) metal/electric implants in the head-neck district, (v) severe cognitive  
119 deficits, (vi) medical conditions predisposing to greater epileptic risk or side effects during TMS (including personal  
120 or family history of epilepsy, brain ischemic events, neurological diseases, neurosurgical interventions, vascular or  
121 orthopedic head-neck surgery, major head trauma, severe migraine or headaches), (vii) heart, respiratory, kidney,  
122 liver failures or immuno-suppression, (viii) substance use disorders, (ix) history of psychotic or mood disorders  
123 based on DSM-5, and (x) intellectual disability. Participation in the study is conditional on the signature of the  
124 written informed consent to the study protocol and fulfillment of the eligibility criteria.

## 125 Study design

126 This is an Italian, single-center, one-harm, non-randomized interventional study. The study procedure involves four  
127 main phases, (i) screening and enrolment, (ii) pre-experimental assessment, (iii) VR experimental assessment, and  
128 (iv) post-experimental debriefing, which are schematized in Fig.1 and detailed in the homonymous subsections of  
129 “Interventions”.

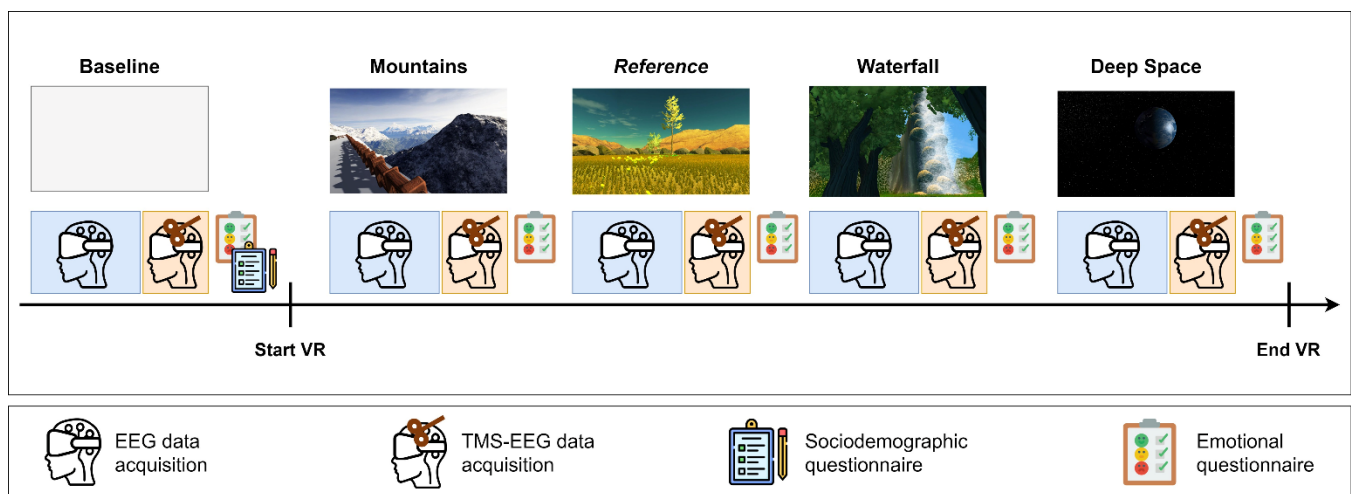

130

131 *(Fig. 1. Experimental protocol. EEG and TMS-EEG data are recorded at baseline, along with sociodemographic*  
132 *and emotional questionnaires. EEG data is recorded during each VR scenario, and TMS-EEG is recorded right*  
133 *after the end of the navigation. Afterward, emotional questionnaires are administered).*

134 The study protocol conforms to the Helsinki Declaration and has been approved January 26<sup>th</sup>, 2021, by the  
135 competent Ethical Committee of the Fondazione IRCCS Ca' Granda Ospedale Maggiore Policlinico, Milan  
136 (OSMAMI-26/01/2021-0002688-U).

## 137 **Study material**

### 138 **Questionnaires**

- 139 1. Case Report Form (CRF): ad-hoc questionnaire for collection of biographic, socio-demographic, and  
140 anamnestic information, administered to aspirant participants to check their fulfillment of the inclusion  
141 criteria and to investigate any previous experiences with VR environments.
- 142 2. short Positive And Negative Affect Scale (PANAS): a brief version of the homonymous scale that measures  
143 two main clusters of affective experiences, positive affect and negative affect, by rating 20 adjectives on a  
144 5-point Likert scale (33).
- 145 3. Single Item Emotion (SIE) scale: a questionnaire that rates eight emotions, including awe, on a 7-point  
146 Likert scale (22).
- 147 4. Short Awe Scale (SAS): brief 7-item version of the Awe-Experience Scale (34), which explores the  
148 intensity of perceived awe (35).
- 149 5. Hamilton Depression Rating Scale (HDRS): a 17-item measure of depression severity rated by the clinician  
150 (36).
- 151 6. Visual Analog Mood Scale (VAS): a single-item measure of feeling state rated by the participant (37).

### 152 **VR equipment and scenarios**

153 The VR system is composed of an Oculus Rift DK2 (Oculus VR LLC, Irvine, CA, United States) equipped  
154 with headphones and a Microsoft Xbox controller and connected to a computer with an NVIDIA GTX1070 graphic  
155 card and Intel i7 GPU. The Oculus Rift DK2 is a head-mounted display with a 1920×1080-pixel resolution and 90  
156 Hz frame rate. Four interactive and immersive VR scenarios modeled using the Unity software (version 5.5.1) are  
157 employed. All scenarios represent natural scenes; three of them have been validated to induce different instances of



158 awe, whereas the remaining one is a neutral, reference condition (22). The three awe-inducing scenarios represent  
159 natural scenes of (i) a forest with tall trees, (ii) high mountains, and (iii) the earth viewed from deep space. The  
160 neutral reference scenario represents a green grass with few flowers and trees. In the (i) and (ii) scenarios,  
161 environmental sounds consistent with the virtual landscapes are added to the visual stimuli with an intensity  
162 proportional to the participant's proximity to the sound source.

### 163 **TMS-EEG equipment**

164 The equipment is composed of a Geodesic EEG system 400 (GES 400, Electrical Geodesic Inc., Philips,  
165 the Netherlands) equipped with a TMS-compatible 64-channel Microcel Geodesic sensor net (GSN 100, Electrical  
166 Geodesic Inc., Philips, the Netherlands). The EEG device is combined with an STM9000 TMS system (Ates  
167 Medica Device s.r.l, Italy) equipped with a 70-mm butterfly cooled coil and with the NetBrain 9000 neuronavigation  
168 system (EBNeuro S.p.A, Italy).

### 169 **Interventions**

170 The four phases of the study procedure are described in the following dedicated sections.

#### 171 **Screening and enrolment**

172 In this phase, the aspirant participant is informed of the study procedures and freely decides whether to  
173 consent to participate in the study. If so, after the signature of the written informed consent, a univocal code is  
174 assigned to the aspirant participant. Eligibility criteria and previous experiences with VR are investigated via the  
175 administration of the CRF questionnaire. If inclusion criteria are met, the participant is invited to a second visit that  
176 includes the three remaining phases.

#### 177 **Pre-experimental assessment.**

178 The participant's emotional status is retrieved via the short PANAS, SIE, and SAS questionnaires. The  
179 participant's mood is explored via the HDRS and VAS questionnaires. The experimental setup is prepared through  
180 the montage and functional check of the VR, TMS, and EEG devices. Eyes-closed resting-state EEG recordings

181 (lasting 2 minutes) and TMS-EEG recordings (lasting about 3.5 minutes) are performed. More details can be found  
182 in the “TMS-EEG protocol” section.

### 183 **VR experimental assessment**

184 After receiving instructions about the VR experiment, the participant navigates the VR scenarios (three awe-  
185 inducing and one of reference) in a counterbalanced order, for about 3 minutes each. Before each experience, the  
186 participant is instructed on how to navigate and is asked to keep her/his eyes closed until the scenario has started.  
187 EEG signals are continuously recorded during navigation in each VR scenario. An event on the signal is marked at  
188 the moment in which the participant opens the eyes and starts the navigation. In the awe-inducing scenarios, a  
189 further event is marked when the maximum awe intensity is reached, according to the psychologist, after which the  
190 navigation continues for at least 30 seconds. Right after, the participant is requested to stay still, looking at the VR-  
191 induced landscape in front of her/him, while TMS-EEG recordings are performed (lasting about 3.5 minutes, see  
192 “TMS-EEG protocol”). After the TMS-EEG session, the participant’s emotional and mood status is assessed  
193 through the re-administration of the short PANAS, SIE, SAS, and VAS scales.

### 194 **Post-experimental debriefing**

195 At the end of the VR experiment, main participants’ perceptions and feelings concerning the VR experiences are  
196 captured through a debriefing with the psychologist, which is recorded upon the participants’ consent.

### 197 **TMS-EEG protocol**

198 During both EEG and TMS-EEG sessions, EEG signals are recorded at a sampling frequency of 1000 Hz. During  
199 the TMS-EEG sessions, EEG signals are continuously recorded while 105 TMS pulses are delivered over the left  
200 DLPFC at 0.5 Hz and with a stimulus intensity around 120% of the individual resting motor threshold (rMT). In  
201 the pre-experimental phase, the rMT is measured as the minimum intensity needed to obtain 5 out of 10 consecutive  
202 right-index movements when stimulated by the left primary motor cortex. The stimulation site of the DLPFC is then  
203 defined as an electrode-free point between electrodes E12 (F3) and E15 (FC3), 5 cm ahead of the stimulation motor  
204 point. The coil is placed tangentially to the scalp and perpendicular to the EEG wires' direction in order to reduce

205 the TMS-induced decay artifact (38,39). To ensure that the stimulation point is inside the DLPFC and to increase  
206 the intra-subject reproducibility of the stimulation across different TMS-EEG sessions, the neuronavigation system  
207 is used. Through preliminary tests, the stimulation point location and intensity are chosen considering the TMS-  
208 related artifacts on the EEG, the comfort of the patient, and using as anatomical reference the middle frontal gyrus  
209 defined using the Atlas69 atlas on a template image of the neuronavigator. According to the listed parameters, the  
210 stimulation point location and coil orientation are saved in the neuronavigator and replicated in the following TMS-  
211 EEG sessions. Lastly, to reduce the auditory evoked potential evoked by the TMS pulses, a white noise signal is  
212 reproduced during the TMS-EEG sessions through the headphones of the Oculus Rift DK2. The volume of the  
213 white noise is adjusted for every participant to cover the TMS clicking noise and accommodate their comfort.

## 214 **Sample size calculation**

215 The SUBRAIN study is purely explorative, therefore there is a lack of hypotheses on the size of the physiological  
216 behavioral and brain responses to the innovative VR protocol. For these reasons, the sample size calculation is based  
217 on the financial resources available for the study conduction. The outcome of the proposed experimental protocol  
218 will be measured in terms of the possibility of (i) effectively sending the TMS pulses to the target region, taking  
219 into account the VR equipment, (ii) obtaining good quality EEG signal during the VR protocol to extract features  
220 of interest, and (iii) effectively removing TMS-induced artifacts from the EEG signals. Considering the ISO  
221 guidelines of the technical committee ISO/TC 210 (“Quality management and corresponding general aspects for  
222 medical devices”) regarding usability testing of medical devices, we anticipate that the use of the new experimental  
223 protocol on 5/10 subjects will allow most (> 70%) of the technical problems of integration of the three systems  
224 (VR, EEG, and TMS) to emerge. These problems will be examined and addressed to refine the experimental  
225 protocol, which will be applied to the rest of the study sample. Finally, the study's statistical power, in terms of  
226 emotional-behavioral and cerebral correlates of experiences in VR, will be examined and discussed retrospectively.

## 227 **Data management plan**

228 Experimenters guarantee the anonymity of the volunteers, treating their common and sensitive data, excluding the  
229 personal ones, and avoiding their association with the person by using a pseudonymized form. At the beginning of  
230 the experiment, the experimenters associate a code that identifies the subject's data during all the experimentation  
231 phases. The experimental data, including signals, socio-demographical and anamnestic data, and questionnaires,  
232 are recorded, analyzed, and preserved along with the code. The file associating participants' codes and their  
233 identification data and the one containing experimental data associated with the participants' codes are stored on a  
234 password-protected computer. Only experimenters and authorized personnel can link the code to the name of the  
235 volunteer. Data is recorded, processed, and stored by electronic and non-electronic devices and will be disseminated  
236 only in strictly pseudonymized form, such as through scientific publications and conferences.

## 237 **Primary endpoints**

238 Development of the experimental and innovative setup based on the successful combination of VR, TMS, EEG,  
239 and clinical questionnaires to induce different instances of the awe experience and study its emotional-behavioral  
240 and cerebral correlates. Particularly, (i) setup, test, and refinement in a pilot sample (n=6), and usage in an  
241 independent sample (n=44), and (ii) identification of emotional-behavioral and brain functional mechanisms,  
242 including neuronal oscillatory activity, cortical excitability, and pathways of propagation of neuronal information,  
243 underlying the awe experience.

## 244 **Secondary endpoints**

245 Identification of specific emotional-behavioral and brain functional mechanisms underlying the different VR-  
246 induced awe experiences. Specifically, investigation of (i) the different types and intensities of awe inspired by VR  
247 scenarios, (ii) the neural correlates of the subjective awe experience, reported in the questionnaires, independently  
248 of the VR scenario itself, and (iii) the specific neural correlates of each VR scenario, by means of comparison  
249 between the sublime-inducing VR scenario and the reference one.

## 250 **Safety considerations**

251 The project does not involve administering drugs or other substances or invasive clinical practices. Therefore, no  
252 adverse events are expected. The interventional design of the study is exclusively due to the use of the innovative  
253 VR-TMS-EEG experimental setup, whose components are non-invasive. TMS stimuli, when administered  
254 repetitively, several times per second, can induce seizures in predisposed subjects (0.003% of cases). Such seizures  
255 are of short duration and leave no consequences. The protocol involves sending TMS stimuli at intervals of more  
256 than one second apart. In addition, personal or family history of epilepsy, neurological diseases, neurosurgical  
257 interventions, and major head trauma that increase epileptic risk constitute exclusion criteria for the study. At  
258 stimulation frequencies such as those used in our study, the risk of seizure induction in subjects not predisposed to  
259 develop seizures is negligible (less than 2 cases per 1000 stimulation sessions). The prolonged use of VR can  
260 produce discomfort, such as nausea, dizziness, and increased muscle fatigue.

## 261 **Statistical analyses**

262 EEG and TMS-EEG data pre-processing is carried out using BrainVision Analyzer (BrainProducts, Germany) and  
263 EEGLAB, an open-source toolbox running in Matlab R2022a (Mathworks, Inc., Natick, Massachusetts, USA).  
264 Neuronal and emotional questionnaire data are analyzed using in-house Matlab scripts.

265 Statistical data analyses aim to evaluate the differences, in terms of emotional questionnaire scores and neural  
266 correlates, induced by (i) the experience of awe, comparing the awe-inducing VR scenarios with the reference VR  
267 one and (ii) the VR, comparing the reference VR scenario with the baseline. A further objective is to correlate the  
268 neuronal changes with the emotional ones. To achieve these goals, (i) the values of intensity of emotional  
269 dimensions recorded with the SAS, SIE, and PANAS questionnaires are compared using paired t-tests or Friedman  
270 statistics across conditions to evaluate the subjective effect of the different VR scenarios. Brain complexity, power,  
271 and functional and effective connectivity features are extracted from the EEG signal and used to evaluate differences  
272 of multiple cerebral dimensions among the experimental conditions, ultimately providing a wide comprehension of  
273 the neural bases of the awe emotion. Amplitude and latency of TMS-evoked potentials (TEPs) of interest (40) and  
274 TMS-evoked effective connectivity indices (41) are calculated from the TMS-EEG data and compared among the

275 experimental conditions. Power and connectivity analyses are performed in the main EEG frequency bands (delta:  
276 1-4 Hz, theta: 4–8 Hz, alpha: 8–13 Hz, beta: 13–30 Hz, and gamma: 30–50 Hz). Multi-scale connectivity features  
277 are extracted using graph theory. Finally, the association between EEG and TMS-EEG features and scores in the  
278 emotional questionnaires is further investigated via generalized linear models.

## 279 **Current status**

280 The setup, test, and refinement of the experimental protocol, which is a primary endpoint of the SUBRAIN study,  
281 have been achieved by successfully combining TMS, EEG, VR and by refining their integrated usage in the  
282 experimental session. Up to now data from ten participants (5M,  $27.2 \pm 3.4$  years; 5F,  $28.4 \pm 5.2$  years), including  
283 six participants for the pilot study, have been recorded. Using the proposed protocol, a pilot study on six healthy  
284 controls showed the possibility of extracting standard TEPs, in line with the literature, when stimulating the left  
285 DLPFC at baseline (40). This pilot study has been followed by the inclusion of the neuronavigator in the  
286 experimental equipment, which has allowed us to improve the intra-subject reproducibility of TMS pulses sent after  
287 the navigation in different VR scenarios. Also, to ensure the robustness of the analyses, the nauseous state of the  
288 subject, found especially after the reference scenario, was tracked with annotations with the goal of incorporating  
289 it into statistical models. The endpoints relative to the investigation of the psychological and brain correlates of the  
290 VR-induced awe experience are still under study. A preliminary analysis showed a correlation between the reported  
291 intensity of awe emotion and the amplitude or latency of specific TEPs of interest. Also, different VR scenarios  
292 reported different brain responses regarding both EEG power spectrum and EEG connectivity. Specifically, the  
293 preliminary findings suggest an increase of connectivity in delta and theta bands for space and mountain scenarios.

## 294 **Data availability**

295 Socio-demographic data, psychopathological and emotional questionnaire scores, EEG, and TMS-EEG data  
296 recorded with the described protocol are protected by privacy and will be available from the corresponding author  
297 upon reasonable request, after the signature of a formal data sharing agreement, in an anonymous form.

## 298 **Discussion**

299 Through the incorporation of pioneering quantitative, multidisciplinary, and multimodal experimental and  
300 analytical methodology, this protocol aims to enhance the currently limited understanding of the cerebral  
301 foundations of the awe emotion. We seek to present fresh insights into the collaboration of various brain regions in  
302 generating the profound, enigmatic, and transformative experience of awe. This protocol employs a meticulously  
303 designed framework that integrates VR with neural techniques, including EEG and TMS, alongside emotional  
304 questionnaires, to investigate the mechanisms underpinning VR-induced awe experiences.

305 The preliminary data obtained so far demonstrates the proposed protocol's feasibility and reproducibility, unveiling  
306 distinctions of neural mechanisms across various VR-induced awe scenarios. The use of interactive and immersive  
307 VR as an awe-inducing medium enables the participant's full and ecological immersion in the experience, as  
308 previously demonstrated (20,22), whereas the combination of EEG and TMS enables the extensive exploration of  
309 the cortical changes induced by diverse instances of awe through VR scenarios, offering novel insights into this  
310 intricate emotional experience. Integrating different neural techniques and tailored psychological questionnaires  
311 contributes to unveiling the specific emotion under study and opens the door to new insights into the brain  
312 mechanisms underlying the perception of complex emotions.

313 A central question arising from this investigation pertains to the potential use of experiential interventions based on  
314 the Hry elicitation of awe emotion to promote mental health. At a biological level, awe appears to decrease default  
315 mode network activity (24), sympathetic activation (21), and pro-inflammatory cytokines (42). Moreover, awe  
316 seems to reduce the ruminative and self-referential thinking characterizing some psychiatric disorders, such as  
317 Major Depressive Disorder (MDD). The natural extension of the proposed study will employ this experimental  
318 framework in the study of MDD to gain a deeper understanding of the neurobiological correlates of awe in affected  
319 individuals, investigating the therapeutic potentiality of awe-inducing VR scenarios.

320 While focusing on the awe emotion, our approach offers a reproducible framework adaptable to diverse research  
321 domains, especially those exploring immersive experiences. However, several limitations merit consideration. VR

322 could induce sickness and nausea in some patients (43) which could, in turn, impact the experience, altering the  
323 experience of awe and its beneficial effects. A questionnaire evaluating the level of nausea after each VR scenario  
324 should be implemented to keep track of this phenomenon. Our study implemented three different awe-inducing  
325 scenarios designed to enhance the vastness dimension (23,44), however, other awe dimensions could be  
326 investigated, increasing the number of possible new VR scenarios. Finally, an intrinsic limitation is posed by the  
327 use of EEG to investigate brain activity, due to its inability to unambiguously detect the activity of deep neural  
328 sources, such as EEG signal changes generated by areas of the DMN. Nevertheless, the possibility to combine EEG  
329 with VR and TMS makes this technique the most suitable for our research purpose, that is, to understand the  
330 functional brain correlates of the awe emotion elicited in an immersive environment.

## 331 **Conclusion**

332 Our study results from an unprecedented synergistic integration of complementary expertise in bioengineering,  
333 psychology, philosophy, and psychiatry. SUBRAIN adopts an innovative, quantitative, and multimodal  
334 experimental and analytical approach to increase the currently limited knowledge of the cerebral bases of the awe  
335 experience. With this protocol, we intend to provide new evidence on how multiple brain areas can work together  
336 to produce the powerful, mysterious, transformative awe emotion.

## 337 **Acknowledgments**

338 We wish to thank Viviana Pescuma, Yara Massalha, and Andrea Anastasi for the crucial contribution to the data  
339 acquisition phase.

## 340 **References**

- 341 1. Burke E. A Philosophical Enquiry into the Origin of Our Ideas of the Sublime and Beautiful. A Philosophical  
342 Enquiry into the Origin of Our Ideas of the Sublime and Beautiful. 2008 Dec 31;



- 343 2. sublime MMMI gonzo, 2005 undefined. Il gonzo sublime: dal patetico al kitsch. torrossa.comM Mazzocut-  
344 MisIl gonzo sublime, 2005•torrossa.com [Internet]. [cited 2024 Mar 24]; Available from:  
345 <https://www.torrossa.com/gs/resourceProxy?an=3016630&publisher=F18765>
- 346 3. Giordanetti P, Mazzocut-Mis M. I luoghi del sublime moderno: percorso antologico-critico. 2012;
- 347 4. Mazzocut-Mis M. How far can we go? Pain, excess and the obscene [Internet]. 2012 [cited 2024 Mar 24].  
348 Available from:  
349 [https://books.google.it/books?hl=en&lr=&id=RzcsBwAAQBAJ&oi=fnd&pg=PR7&dq=How+Far+Can+](https://books.google.it/books?hl=en&lr=&id=RzcsBwAAQBAJ&oi=fnd&pg=PR7&dq=How+Far+Can+We+Go%3F+Pain,+Excess+and+the+Obscene&ots=bgBj09my14&sig=APegQhiG2WkNTrG465SF2xV)  
350 [We+Go%3F+Pain,+Excess+and+the+Obscene&ots=bgBj09my14&sig=APegQhiG2WkNTrG465SF2xV](https://books.google.it/books?hl=en&lr=&id=RzcsBwAAQBAJ&oi=fnd&pg=PR7&dq=How+Far+Can+We+Go%3F+Pain,+Excess+and+the+Obscene&ots=bgBj09my14&sig=APegQhiG2WkNTrG465SF2xV)  
351 PSs
- 352 5. Brady E. The Sublime in Modern Philosophy: Aesthetics, Ethics, and Nature. Cambridge, Cambridge  
353 University Press. 2013;
- 354 6. Richardson A. The neural sublime: Cognitive theories and romantic texts. JHU Press; 2010.
- 355 7. Onians J. Neuroscience and the Sublime in Art and Science. na; 2011.
- 356 8. Ishizu T, Zeki S. A neurobiological enquiry into the origins of our experience of the sublime and beautiful.  
357 *Front Hum Neurosci*. 2014 Nov 11;8(November):112528.
- 358 9. Ishizu T, one SZP, 2011 undefined. Toward a brain-based theory of beauty. *journals.plos.org*T Ishizu, S  
359 ZekiPloS one, 2011•*journals.plos.org* [Internet]. 2011 [cited 2024 Mar 25];6(7):21852. Available from:  
360 <https://journals.plos.org/plosone/article?id=10.1371/journal.pone.0021852>
- 361 10. Ishizu T, Zeki S. The brain's specialized systems for aesthetic and perceptual judgment. *European Journal*  
362 *of Neuroscience*. 2013 May;37(9):1413–20.
- 363 11. Clewis RR, Yaden DB, Chirico A. Intersections Between Awe and the Sublime: A Preliminary Empirical  
364 Study.

- 365 12. Possible RCTPE of the, 2023 undefined. Sublime. Springer [Internet]. [cited 2024 Mar 25]; Available from:  
366 [https://link.springer.com/content/pdf/10.1007/978-3-030-90913-0\\_114.pdf](https://link.springer.com/content/pdf/10.1007/978-3-030-90913-0_114.pdf)
- 367 13. Arcangeli M, Sperduti M, Jacquot A, Piolino P, Dokic J. Awe and the Experience of the Sublime: A Complex  
368 Relationship. *Front Psychol*. 2020 Jun 16;11.
- 369 14. Chirico A, Clewis RR, Yaden DB, Gaggioli A. Nature versus art as elicitors of the sublime: A virtual reality  
370 study. *PLoS One* [Internet]. 2021 Mar 1 [cited 2024 Feb 18];16(3):e0233628. Available from:  
371 <https://journals.plos.org/plosone/article?id=10.1371/journal.pone.0233628>
- 372 15. Burke E. A Philosophical Enquiry into the Origin of Our Ideas of the Sublime and Beautiful. A Philosophical  
373 Enquiry into the Origin of Our Ideas of the Sublime and Beautiful. 1958 Dec 31;
- 374 16. Chaudhury S, Garg N, Emotion ZJ, 2022 undefined. The curious case of threat-awe: A theoretical and  
375 empirical reconceptualization. *psycnet.apa.org* [Internet]. [cited 2024 Mar 21]; Available from:  
376 <https://psycnet.apa.org/record/2021-85863-001>
- 377 17. Chirico A, Clewis RR, Yaden DB, Gaggioli A. Nature versus art as elicitors of the sublime: A virtual reality  
378 study. *PLoS One*. 2021 Mar 1;16(3):e0233628.
- 379 18. Yaden DB, Iwry J, Slack KJ, Eichstaedt JC, Zhao Y, Vaillant GE, et al. The overview effect: Awe and self-  
380 transcendent experience in space flight. *Psychology of Consciousness: Theory, Research, and Practice*. 2016  
381 Mar;3(1):1–11.
- 382 19. Chirico A, Yaden DB, Riva G, Gaggioli A. The potential of virtual reality for the investigation of awe. *Front*  
383 *Psychol* [Internet]. 2016 Nov 9 [cited 2024 Feb 18];7(NOV):223153. Available from: [www.frontiersin.org](http://www.frontiersin.org)
- 384 20. Chirico A, Yaden DB, Riva G, Gaggioli A. The potential of virtual reality for the investigation of awe. *Front*  
385 *Psychol*. 2016 Nov 9;7(NOV):223153.
- 386 21. Chirico A, Cipresso P, Yaden DB, Biassoni F, Riva G, Gaggioli A. Effectiveness of Immersive Videos in  
387 Inducing Awe: An Experimental Study. *Scientific Reports* 2017 7:1. 2017 Apr 27;7(1):1–11.

- 388 22. Chirico A, Ferrise F, Cordella L, Gaggioli A. Designing awe in virtual reality: An experimental study. *Front*  
389 *Psychol.* 2018 Jan 22;8(JAN):293522.
- 390 23. Keltner D, Haidt J. Approaching awe, a moral, spiritual, and aesthetic emotion. *Cogn Emot.* 2003  
391 Mar;17(2):297–314.
- 392 24. van Elk M, Arciniegas Gomez MA, van der Zwaag W, van Schie HT, Sauter D. The neural correlates of the  
393 awe experience: Reduced default mode network activity during feelings of awe. *Hum Brain Mapp.* 2019  
394 Aug 15;40(12):3561–74.
- 395 25. Ishizu T, Zeki S. A neurobiological enquiry into the origins of our experience of the sublime and beautiful.  
396 *Front Hum Neurosci.* 2014 Nov 11;8(November):112528.
- 397 26. Takano R, Nomura M. Neural Representations of Awe: Distinguishing Common and Distinct Neural  
398 Mechanisms. *Emotion.* 2022;22(4):669–77.
- 399 27. Coelli S, Maggioni E, Cerutti S, Nobili L, Rubino A, Campana C, et al. Functional Clustering approach for  
400 the analysis of Stereo-EEG activity patterns in correspondence of epileptic seizures. *Proceedings of the*  
401 *Annual International Conference of the IEEE Engineering in Medicine and Biology Society, EMBS.* 2017  
402 Sep 13;2806–9.
- 403 28. Schiena G, Maggioni E, Pozzoli S, Brambilla P. Transcranial magnetic stimulation in major depressive  
404 disorder: Response modulation and state dependency. *J Affect Disord.* 2020 Apr 1;266:793–801.
- 405 29. Canali P, Sferrazza Papa G, Casali AG, Schiena G, Fecchio M, Pigorini A, et al. Changes of cortical  
406 excitability as markers of antidepressant response in bipolar depression: preliminary data obtained by  
407 combining transcranial magnetic stimulation (TMS) and electroencephalography (EEG). *Bipolar Disord.*  
408 2014 Dec 1;16(8):809–19.
- 409 30. Coelli S, Maggioni E, Rubino A, Campana C, Nobili L, Bianchi AM. Multiscale Functional Clustering  
410 Reveals Frequency Dependent Brain Organization in Type II Focal Cortical Dysplasia with Sleep  
411 Hypermotor Epilepsy. *IEEE Trans Biomed Eng.* 2019 Oct 1;66(10):2831–9.

- 412 31. Maggioni E, Zucca C, Reni G, Cerutti S, Triulzi FM, Bianchi AM, et al. Investigation of the  
413 electrophysiological correlates of negative BOLD response during intermittent photic stimulation: An EEG-  
414 fMRI study. *Hum Brain Mapp.* 2016 Jun 1;37(6):2247–62.
- 415 32. Chirico A, Glaveanu VP, Cipresso P, Riva G, Gaggioli A. Awe Enhances Creative Thinking: An  
416 Experimental Study. *Creat Res J.* 2018 Apr 3;30(2):123–31.
- 417 33. Terracciano A, McCrae RR, Costa PT. Factorial and Construct Validity of the Italian Positive and Negative  
418 Affect Schedule (PANAS). <https://doi.org/10.1027//1015-5759192131>. 2006 Sep 1;19(2):131–41.
- 419 34. Yaden DB, Kaufman SB, Hyde E, Chirico A, Gaggioli A, Zhang JW, et al. The development of the Awe  
420 Experience Scale (AWE-S): A multifactorial measure for a complex emotion. *J Posit Psychol.* 2019 Jul  
421 4;14(4):474–88.
- 422 35. Chirico A, Yaden DB. Awe: A self-transcendent and sometimes transformative emotion. *The Function of*  
423 *Emotions: When and Why Emotions Help Us.* 2018 Apr 20;221–33.
- 424 36. Fava GA, Kellner R, Munari F, Pavan L. The Hamilton Depression Rating Scale in normals and depressives.  
425 *Acta Psychiatr Scand.* 1982 Jul 1;66(1):26–32.
- 426 37. Aitken RCB. A Growing Edge of Measurement of Feelings [Abridged]: Measurement of Feelings Using  
427 Visual Analogue Scales. *J R Soc Med.* 1969 Oct 1;62(10):989–93.
- 428 38. Rogasch NC, Sullivan C, Thomson RH, Rose NS, Bailey NW, Fitzgerald PB, et al. Analysing concurrent  
429 transcranial magnetic stimulation and electroencephalographic data: A review and introduction to the open-  
430 source TESA software. *Neuroimage.* 2017 Feb 15;147:934–51.
- 431 39. Sekiguchi H, Takeuchi S, Kadota H, Kohno Y, Nakajima Y. TMS-induced artifacts on EEG can be reduced  
432 by rearrangement of the electrode’s lead wire before recording. *Clinical Neurophysiology.* 2011 May  
433 1;122(5):984–90.

- 434 40. Bondi E, Pescuma V, Massalha Y, Pizzolante M, Chirico A, Schiena G, et al. A TMS-EEG Pre-processing  
435 Parameters Tuning Study. *IFMBE Proc.* 2024;93:172–9.
- 436 41. Maggioni E, Arienti F, Minella S, Mameli F, Borellini L, Nigro M, et al. Effective Connectivity During Rest  
437 and Music Listening: An EEG Study on Parkinson’s Disease. *Front Aging Neurosci.* 2021 Apr  
438 28;13:657221.
- 439 42. Stellar JE, John-Henderson N, Anderson CL, Gordon AM, McNeil GD, Keltner D. Positive affect and  
440 markers of inflammation: Discrete positive emotions predict lower levels of inflammatory cytokines.  
441 *Emotion.* 2015 Apr 1;15(2):129–33.
- 442 43. Chang E, Kim HT, Yoo B. Virtual Reality Sickness: A Review of Causes and Measurements. *Int J Hum*  
443 *Comput Interact.* 2020 Oct 20;36(17):1658–82.
- 444 44. Yaden DB, Iwry J, Slack KJ, Eichstaedt JC, Zhao Y, Vaillant GE, et al. The overview effect: Awe and self-  
445 transcendent experience in space flight. *Psychology of Consciousness: Theory, Research, and Practice.* 2016  
446 Mar;3(1):1–11.
- 447
